# Supplementary material for: Role of electrostatic interactions in the adsorption of dye molecules by Ti3C2-MXenes
Source: Royal Society of Chemistry journal article supplement (doi:10.1039/d0ra10876f), 2021-01-01
Supplement: d0ra10876f1.pdf [file d0ra10876f1.pdf]

# **Role of Electrostatic Interactions in the Adsorption of Dye Molecules by $\text{Ti}_3\text{C}_2$ -MXenes (Supporting Information)**

*Sehyeong Lim, Jin Hyung Kim, Hyunsu Park, Chaesu Kwak, Jeewon Yang, Jieun Kim, Seoung Young Ryu, and Joohyung Lee\**

Department of Chemical Engineering, Myongji University, 116 Myongji-ro, Cheoin-gu, Yongin, Gyeonggi-do, 17058, Korea

\*Corresponding Author

Joohyung Lee ([ljbroy@mju.ac.kr](mailto:ljbroy@mju.ac.kr), +82-31-330-6386)

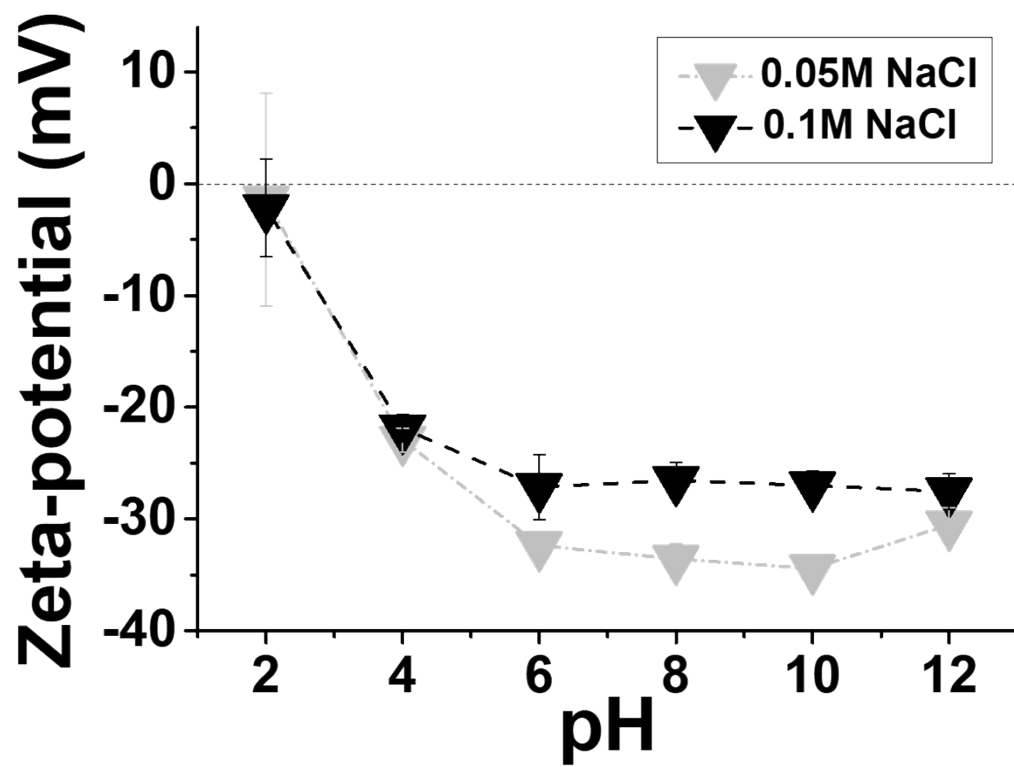

**Figure S1.** Zeta potential of MXenes measured in 0.05 M (grey) and 0.1 M NaCl (black) solutions at different pH levels.

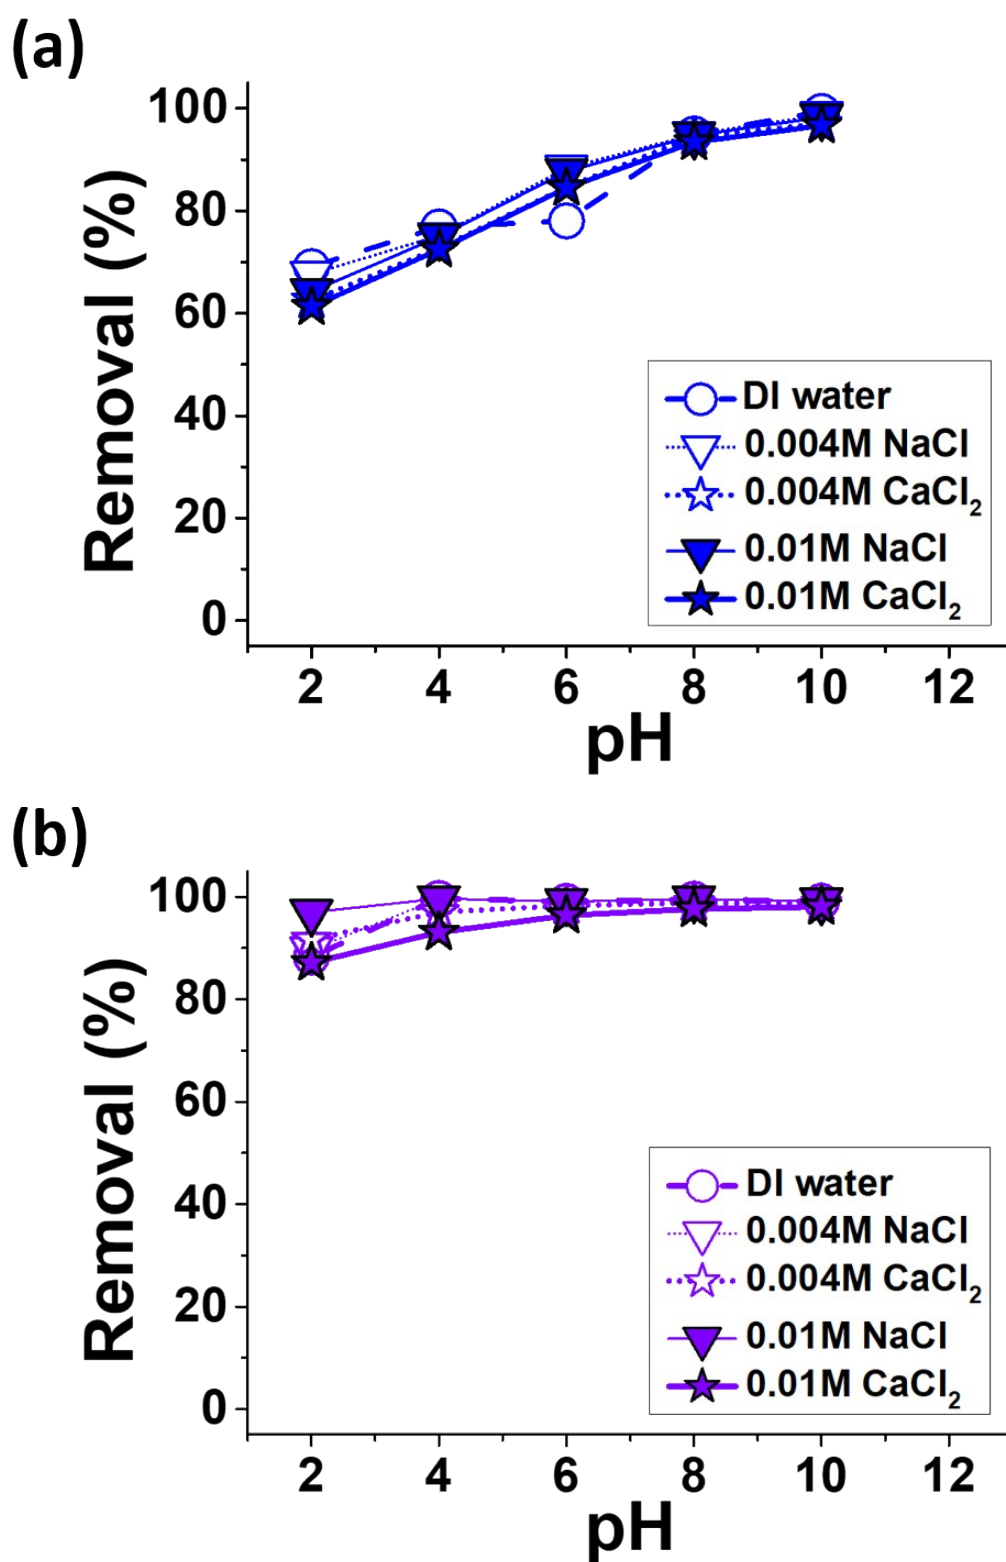

**Figure S2.** Removal efficiencies of MXenes for (a) MB and (b) MV cationic dyes in batch adsorption experiments performed at different salinities for 1 h ( $C_0$ :  $50 \text{ mg}\cdot\text{L}^{-1}$  and MXene concentration:  $0.67 \text{ mg}\cdot\text{L}^{-1}$ ).
